# Supplementary material for: An inverse opal Cu2Nb34O87 anode for high-performance Li+ storage
Source: Royal Society of Chemistry journal article supplement (doi:10.1039/d0cc02016h), 2020-01-01
Supplement: d0cc02016h1.pdf [file d0cc02016h1.pdf]

Supporting Information for

# An inverse opal $\text{Cu}_2\text{Nb}_{34}\text{O}_{87}$ anode for high-performance $\text{Li}^+$ storage

Xiangzhen Zhu<sup>a,b</sup>, Guisheng Liang<sup>b</sup>, Qingfeng Fu<sup>b</sup>, Renjie Li<sup>b</sup>, Yongjun Chen<sup>b,\*</sup>,

Yicheng Bi<sup>c</sup>, Duo Pan<sup>d,f</sup>, Rajib Das<sup>e</sup>, Chunfu Lin<sup>a,\*</sup>, Zhanhu Guo<sup>c,\*</sup>

## Experimental section

### Material preparation

Monodispersed polystyrene (PS) sphere dispersion was synthesized by using a soap-free emulsion polymerization method [S1]. Then, the PS spheres were close-packed into colloidal crystals by centrifugation (3000 rpm, 12 h), and dried at 60 °C for 12 h.

The metal precursor solution was obtained by dissolving a desired amount of mixed metal salt ( $\text{Cu:Nb}=1:17$ , molar ratio) into absolute ethanol. Typically, 0.5 mmol copper nitrate hydrate ( $\text{Cu}(\text{NO}_3)_2 \cdot x\text{H}_2\text{O}$ , 99.99%, Macklin) and 8.5 mmol niobium ethoxide ( $\text{Nb}(\text{OC}_2\text{H}_5)_5$ , 99.999%, Sigma–Aldrich) were dissolved into 9 mL absolute ethanol (99.5%, Macklin) under vigorous stirring to form a transparent solution with a light blue colour. Then, 1.5 g PS colloidal crystals were soaked in the

above metal precursor solution for 3 h. Due to capillarity, a certain amount of the solution was impregnated to the macropores in the PS template. The excess solution was removed from the impregnated PS template by filtration. The obtained powder was dried at 60 °C for 12 h in air, and calcined in a tube furnace under an air flow to remove the template and to crystallize  $\text{Cu}_2\text{Nb}_{34}\text{O}_{87}$ . The calcination temperature was raised to 850 °C at a rate of 1 °C min<sup>-1</sup>, and 850 °C was kept for 4 h.

### **Material characterization**

A powder X-ray diffraction (XRD) measurement was performed on a Bruker D8 Advance diffractometer to study the crystal structure. The chemical valences of the cations were determined by using an X-ray photoelectron spectrometer (XPS, Thermo Escalab 250Xi, USA). The particle size, morphology and microstructure were systematically investigated by using a field-emission scanning electron microscope (FESEM, Hitachi S-4800, Japan) and high-resolution transmission electron microscope (HRTEM, FEI Tecnai G2 F20 STWIN, USA). A  $\text{N}_2$  adsorption/desorption isotherm for calculating the Branauer–Emmett–Teller (BET) specific surface area was recorded by using a surface area analyzer (ASAP 2020, USA).

### **Electrochemical test**

To examine the electrochemical properties of IO- $\text{Cu}_2\text{Nb}_{34}\text{O}_{87}$ , a CR2016-type IO- $\text{Cu}_2\text{Nb}_{34}\text{O}_{87}$ /Li half cell and a  $\text{LiMn}_2\text{O}_4$ /IO- $\text{Cu}_2\text{Nb}_{34}\text{O}_{87}$  full cell were assembled in an glove box filling with pure Ar. The working electrodes were prepared by coating a

uniform mixture of 65 wt% active materials (IO-Cu<sub>2</sub>Nb<sub>34</sub>O<sub>87</sub> or LiMn<sub>2</sub>O<sub>4</sub> (RDF15B, Shenzhen Kejingstar Technologies Ltd.)), 10 wt% polyvinylidene fluoride (PVDF) and 25 wt% conductive carbon (Super P<sup>®</sup>) on Cu-plate (for IO-Cu<sub>2</sub>Nb<sub>34</sub>O<sub>87</sub>) or Al-plate (for LiMn<sub>2</sub>O<sub>4</sub>) current collectors. The mass loading of IO-Cu<sub>2</sub>Nb<sub>34</sub>O<sub>87</sub> in the composite electrodes was ~1.0 mg cm<sup>-2</sup>, and that of LiMn<sub>2</sub>O<sub>4</sub> was ~3.0 mg cm<sup>-2</sup>. The N/P ratio in the full cell was ~1:1.1. 1 M LiPF<sub>6</sub> dissolved in 1:1:1 (vol/vol/vol) ethylene carbonated (EC)/dimethyl carbonate (DMC)/diethylene carbonate (DEC) served as electrolyte. Celgard<sup>®</sup> 2325 microporous polypropylene films were employed as separators. A Li foil was used as the counter electrode in the IO-Cu<sub>2</sub>Nb<sub>34</sub>O<sub>87</sub>/Li half cell. The galvanostatic discharge/charge tests were conducted on an automatic battery testing system (CT-3008, Neware, China) at 25 °C. The cyclic voltammetry (CV) curves were recorded on an electrochemical workstation (CHI660E, Chenhua, China) at 25 °C.

### Calculation of apparent Li<sup>+</sup> diffusion coefficients

The apparent Li<sup>+</sup> diffusion coefficients (*D*) of IO-Cu<sub>2</sub>Nb<sub>34</sub>O<sub>87</sub> were calculated from CV data (Fig. 3f) based on the classical Randles-Sevcik equation (Fig. 3g):

$$I_p = 2.69 \times 10^5 \times n^{1.5} C S D^{0.5} v^{0.5} \quad (S1)$$

where *I<sub>p</sub>*, *n*, *C*, *S*, and *v* are the peak current of the intensive cathodic/anodic peak, the charge transfer number (1), the allowed Li<sup>+</sup> molar concentration in the Cu<sub>2</sub>Nb<sub>34</sub>O<sub>87</sub> crystals (32.185 mol L<sup>-1</sup>), the electrode area of IO-Cu<sub>2</sub>Nb<sub>34</sub>O<sub>87</sub> (1 cm<sup>2</sup>), and the scanning rate, respectively. The calculations show that IO-Cu<sub>2</sub>Nb<sub>34</sub>O<sub>87</sub> owns large

apparent  $\text{Li}^+$  diffusion coefficients of  $5.2 \times 10^{-11} \text{ cm}^2 \text{ s}^{-1}$  for lithiation and  $6.8 \times 10^{-11} \text{ cm}^2 \text{ s}^{-1}$  for delithiation.

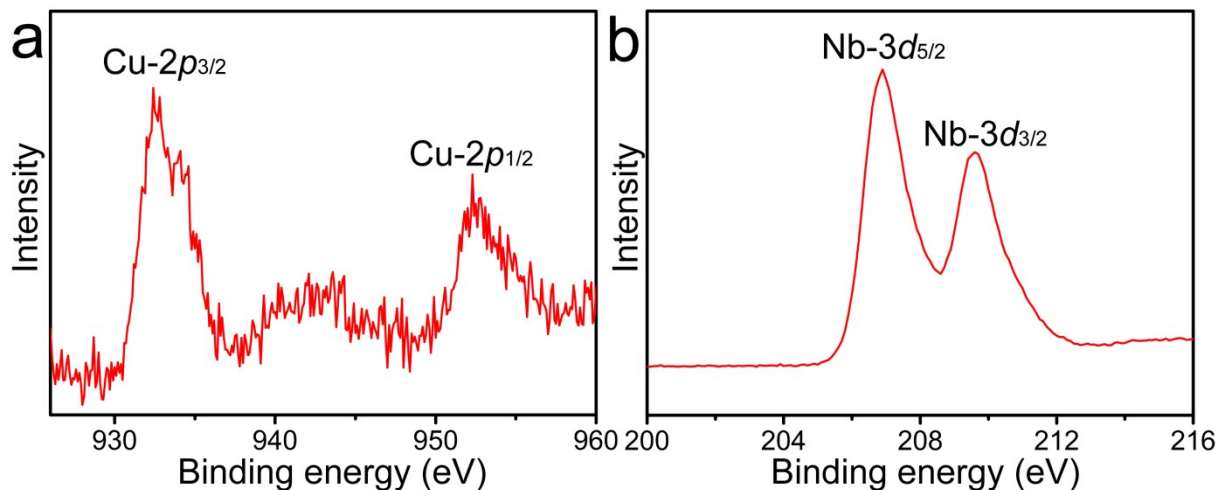

**Fig. S1.** XPS spectra of  $\text{IO-Cu}_2\text{Nb}_{34}\text{O}_{87}$ : (a) Cu-2p and (b) Nb-3d.

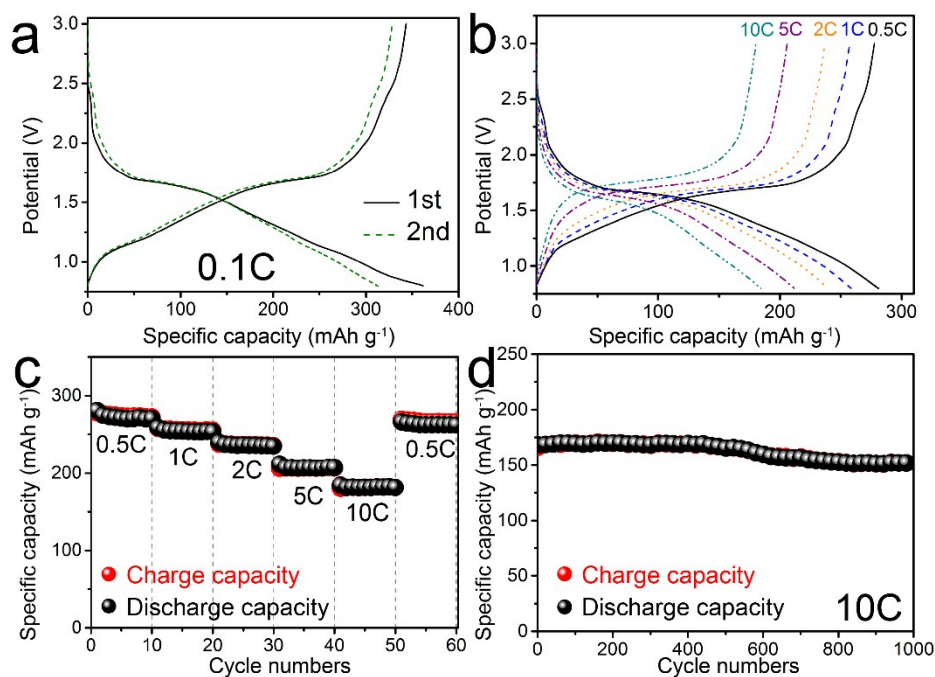

**Fig. S2.** Electrochemical characterizations of  $\text{Cu}_2\text{Nb}_{34}\text{O}_{87}$  micron-sized particles: (a) discharge/charge profiles at 0.1C, (b) discharge/charge profiles at different C-rates, (c) rate performance, and (d) cycling stability at 10C.

**Table S1.** Comparisons of electrochemical performance of IO-Cu<sub>2</sub>Nb<sub>34</sub>O<sub>87</sub> with typical niobium-based oxide anode materials previously reported.

| Material                                                                 | Current rate | Capacity after cycling (mAh g <sup>-1</sup> ) | Reference |
|--------------------------------------------------------------------------|--------------|-----------------------------------------------|-----------|
| IO-Cu <sub>2</sub> Nb <sub>34</sub> O <sub>87</sub>                      | 10C          | ~166 at 1000 <sup>th</sup> cycles             | This work |
| Cu <sub>2</sub> Nb <sub>34</sub> O <sub>87</sub> micron-sized particles  | 10C          | ~151 at 1000 <sup>th</sup> cycles             | [S2]      |
| Three-dimensionally ordered macroporous T-Nb <sub>2</sub> O <sub>5</sub> | 10C          | ~124 at 100 <sup>th</sup> cycles              | [S3]      |
| TiNb <sub>2</sub> O <sub>7</sub> nanoparticles                           | 10C          | ~123 at 500 <sup>th</sup> cycles              | [S4]      |
| TiNb <sub>2</sub> O <sub>7</sub> nanofibers                              | 5C           | ~170 at 500 <sup>th</sup> cycles              | [S5]      |
| TiNb <sub>2</sub> O <sub>7</sub> nanorods                                | 10C          | ~140 at 100 <sup>th</sup> cycles              | [S6]      |
| Three-dimensionally ordered macroporous TiNb <sub>2</sub> O <sub>7</sub> | 10C          | ~87 at 100 <sup>th</sup> cycles               | [S7]      |
| Ti <sub>2</sub> Nb <sub>10</sub> O <sub>29</sub> hollow nanofibers       | 10C          | ~123 at 500 <sup>th</sup> cycles              | [S8]      |
| Porous Ti <sub>2</sub> Nb <sub>10</sub> O <sub>29</sub> nanospheres      | 10C          | ~141 at 1000 <sup>th</sup> cycles             | [S9]      |
| WNb <sub>12</sub> O <sub>33</sub> nanowires                              | 3C           | ~140 at 700 <sup>th</sup> cycles              | [S10]     |
| GeNb <sub>18</sub> O <sub>47</sub> nanofibers                            | 2C           | ~162 at 200 <sup>th</sup> cycles              | [S11]     |
| VNb <sub>9</sub> O <sub>25</sub> nanoribbons                             | 3C           | ~132 at 500 <sup>th</sup> cycles              | [S12]     |
| W <sub>9</sub> Nb <sub>8</sub> O <sub>47</sub> nanofibers                | 5C           | ~113 at 1000 <sup>th</sup> cycles             | [S13]     |
| GaNb <sub>11</sub> O <sub>29</sub> nanowebs                              | 10C          | ~153 at 1000 <sup>th</sup> cycles             | [S14]     |

## References

- [S1] L. Fu, T. Zhang, Q. Cao, H. Zhang, Y. Wu, Preparation and characterization of three-dimensionally ordered mesoporous titania microparticles as anode material for lithium ion battery, *Electrochem. Commun.* 9 (2007) 2140–2144.
- [S2] L.T. Yang, X.Z. Zhu, X.H. Li, X.B. Zhao, K. Pei, W.B. You, X. Li, Y.J. Chen, C.F. Lin, R.C. Che, Conductive copper niobate: superior  $\text{Li}^+$ -storage capability and novel  $\text{Li}^+$ -transport mechanism, *Adv. Energy Mater.* 9 (2019) 1902174.
- [S3] S.F. Lou, X.Q. Cheng, L. Wang, J.L. Gao, Q. Li, Y.L. Ma, Y.Z. Gao, P.J. Zuo, C.Y. Du, G.P. Yin, High-rate capability of three-dimensionally ordered microporous  $\text{TiNb}_2\text{O}_5$  through  $\text{Li}^+$  intercalation pseudocapacitance, *J. Power Sources*, 361 (2017) 80–86.
- [S4] S.F. Lou, Y.L. Ma, X.Q. Cheng, J.L. Gao, Y.Z. Gao, P.J. Zuo, C.Y. Du, G.P. Yin, Facile synthesis of nanostructured  $\text{TiNb}_2\text{O}_7$  anode materials with superior performance for high-rate lithium ion batteries, *Chem. Commun.* 51 (2015) 17293–17296.
- [S5] H. Park, T. Song, U. Paik, Porous  $\text{TiNb}_2\text{O}_7$  nanofibers decorated with conductive  $\text{Ti}_{1-x}\text{Nb}_x\text{N}$  bumps as a high power anode material for Li-ion batteries, *J. Mater. Chem. A* 3 (2015) 8590–8596.
- [S6] L. Hu, C.F. Lin, C.H. Wang, C. Yang, J.B. Li, Y.J. Chen, S.W. Lin,  $\text{TiNb}_2\text{O}_7$  nanorods as a novel anode materials for secondary lithium-ion batteries. *Funct. Mater. Lett.* 9 (2016) 1642004.
- [S7] S.F. Lou, X.Q. Cheng, Y. Zhao, A. Lushington, J.L. Gao, Q. Li, P.J. Zuo, B.Q. Wang, Y.Z. Gao, Y.L. Ma, C.Y. Du, G.P. Yin, X.L. Sun, Superior performance of

ordered macroporous  $\text{TiNb}_2\text{O}_7$  anodes for lithium ion batteries: understanding from the structural and pseudocapacitive insights on achieving high rate capability, *Nano Energy* 34 (2017) 15–25.

[S8] Q.F. Fu, J.R. Hou, R.H. Lu, C.F. Lin, Y. Ma, J.B. Li, Y.J. Chen, Electrospun  $\text{Ti}_2\text{Nb}_{10}\text{O}_{29}$  hollow nanofibers as high-performance anode materials for lithium-ion batteries, *Mater. Lett.* 214 (2018) 60–63.

[S9] S.F. Lou, X.Q. Cheng, J.L. Gao, Q. Li, L. Wang, Y. Cao, Y.L. Ma, P.J. Zuo, Y.Z. Gao, C.Y. Du, H. Huo, G.P. Yin, Pseudocapacitive  $\text{Li}^+$  intercalation in porous  $\text{Ti}_2\text{Nb}_{10}\text{O}_{29}$  nanospheres enables ultra-fast lithium storage, *Energy Storage Mater.* 11 (2018) 57–66.

[S10] L. Yan, H. Lan, H.X. Yu, S.S. Qian, X. Cheng, N.B. Long, R.F. Zhang, M. Shui, J. Shu, Electrospun  $\text{WNb}_{12}\text{O}_{33}$  nanowires: superior lithium storage capability and their working mechanism, *J. Mater. Chem. A* 5 (2017) 8972–8980.

[S11] F.M. Ran, X. Cheng, H.X. Yu, R.T. Zheng, T.T. Liu, X.F. Li, N. Ren, M. Shui, J. Shu, Nano-structured  $\text{GeNb}_{18}\text{O}_{47}$  as novel anode host with superior lithium storage performance, *Electrochim. Acta* 282 (2017) 634–641.

[S12] S.S. Qian, H.X. Yu, L. Yan, H.J. Zhu, X. Cheng, Y. Xie, N.B. Long, M. Shui, J. Shu, High-rate long-life pored nanoribbon  $\text{VNb}_9\text{O}_{25}$  built by interconnected ultrafine nanoparticles as anode for lithium-ion batteries, *ACS Appl Mater. Interfaces* 9 (2017) 30608–30616.

[S13] L. Yan, X. Cheng, H.X. Yu, H.J. Zhu, T.T. Liu, R.T. Zheng, R.F. Zhang, M. Shui, J. Shu, Ultrathin  $\text{W}_9\text{Nb}_8\text{O}_{47}$  nanofibers modified with thermal  $\text{NH}_3$  for superior electrochemical energy storage, *Energy Storage Mater.* 14 (2018) 159–168.

[S14] X.M. Lou, Q.F. Fu, J. Xu, X. Liu, C.F. Lin, J.X. Han, Y.P. Luo, Y.J. Chen, X.Y. Fan, J.B. Li,  $\text{GaNb}_{11}\text{O}_{29}$  nanowebs as high-performance anode materials for lithium-ion batteries, *ACS Appl. Nano Mater.* 1 (2018) 183–190.
